# Supplementary material for: Drosophila Genome-Wide RNAi Screen Identifies Multiple Regulators of HIF–Dependent Transcription in Hypoxia
Source: PubMed Central journal article supplement (PMC2891703; doi:10.1371/journal.pgen.1000994), 2010-06-24

**Figure S1. HRE-Luciferase reporter induction in cells exposed to hypoxia or DFO.**

**A**

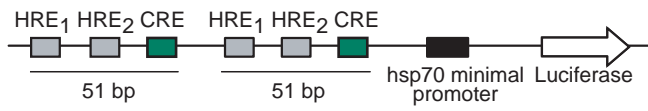

HRE<sub>1</sub> : TACACGTGGGTT  
HRE<sub>2</sub> : CCCGCACGTCCG  
CRE : CTTGACGTCAGC

**B**

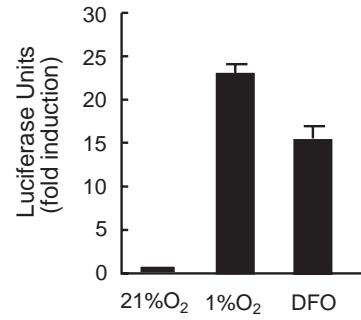

**C**

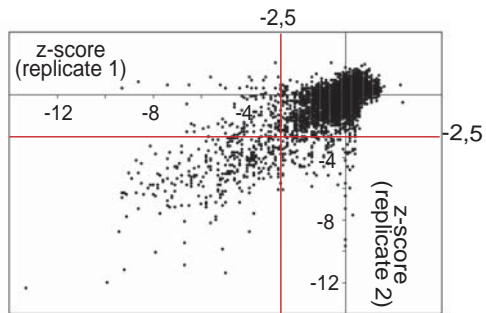

Supplement: pgen.1000994.s001.pdf [file pgen.1000994.s001.pdf]
