# Supplementary material for: Drosophila Genome-Wide RNAi Screen Identifies Multiple Regulators of HIF–Dependent Transcription in Hypoxia
Source: PubMed Central journal article supplement (PMC2891703; doi:10.1371/journal.pgen.1000994), 2010-06-24

**Figure S2. miRNAs and the response to hypoxia.**

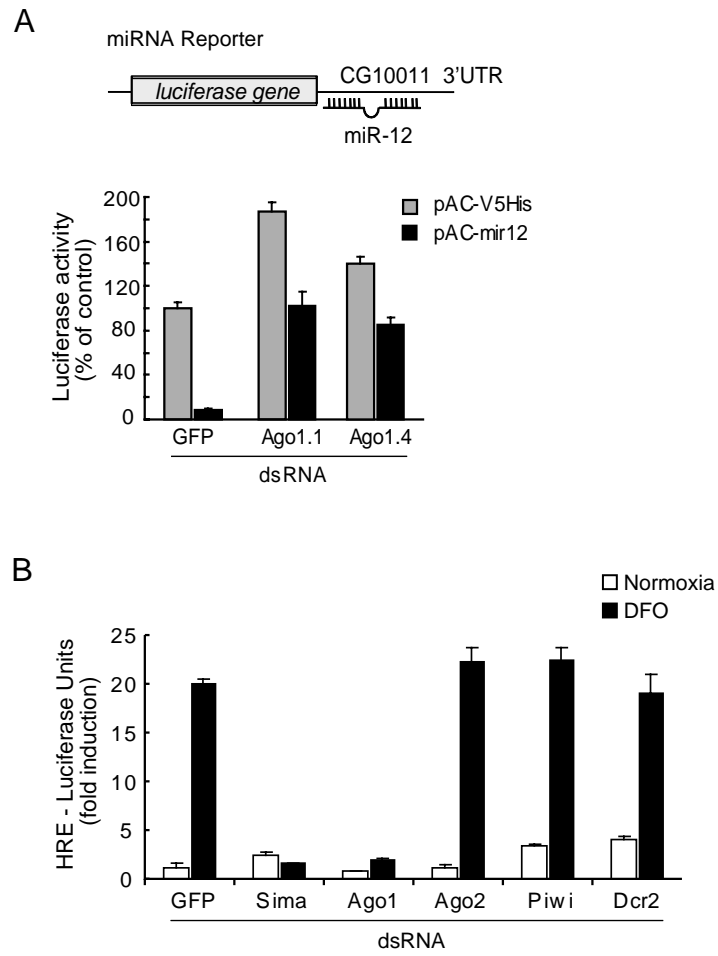

Supplement: pgen.1000994.s002.pdf [file pgen.1000994.s002.pdf]
