# Supplementary material for: Drosophila Genome-Wide RNAi Screen Identifies Multiple Regulators of HIF–Dependent Transcription in Hypoxia
Source: PubMed Central journal article supplement (PMC2891703; doi:10.1371/journal.pgen.1000994), 2010-06-24

**Figure S3. Regulation of Sima subcellular localization is not affected in Ago1 homozygous mutant embryos.**

A

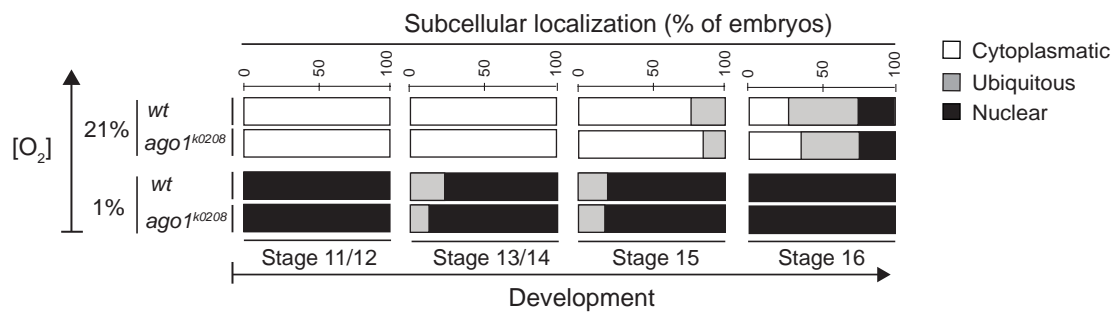

Supplement: pgen.1000994.s003.pdf [file pgen.1000994.s003.pdf]
