# Supplementary material for: Drosophila Genome-Wide RNAi Screen Identifies Multiple Regulators of HIF–Dependent Transcription in Hypoxia
Source: PubMed Central journal article supplement (PMC2891703; doi:10.1371/journal.pgen.1000994), 2010-06-24
Supplement: pgen.1000994.s004.pdf [file pgen.1000994.s004.pdf]

**Table S1. Summary of the three phases of the overall screen for genes required for HIF activity.**

| Screen           | Genes Analyzed                                                                                        | Reporter System                                      | dsRNA library | Stimulus                        | Hit Selection Criterion                                                             | N° of hits |
|------------------|-------------------------------------------------------------------------------------------------------|------------------------------------------------------|---------------|---------------------------------|-------------------------------------------------------------------------------------|------------|
| <b>Primary</b>   | ~22,000 genes<br>(Whole DRSC 1.0 dsRNA library)                                                       | HRE- firefly Luc                                     | DRSC 1.0      | DFO                             | Z score $\leq$ -2,5                                                                 | 609        |
| <b>Secondary</b> | 225 Primary hits<br>(Total primary hits filtered against cell viability screen and Sanger Collection) | HRE- firefly Luc<br>and<br>Actin- <i>Renilla</i> Luc | DRSC 2.0      | DFO                             | Inhibition of<br>HRE-luc activity $\geq$ 50%<br>(Group A >75% ;<br>Group B 50%-75%) | 66         |
| <b>Tertiary</b>  | 35 Secondary hits<br>(Group A and 12 genes from Group B functionally related to Group A genes)        | HRE- firefly Luc<br>and<br>Actin- <i>Renilla</i> Luc | DRSC 2.0      | Hypoxia<br>(1% O <sub>2</sub> ) | Inhibition of<br>HRE-luc activity $\geq$ 50%                                        | 30         |
