# Supplementary material for: Drosophila Genome-Wide RNAi Screen Identifies Multiple Regulators of HIF–Dependent Transcription in Hypoxia
Source: PubMed Central journal article supplement (PMC2891703; doi:10.1371/journal.pgen.1000994), 2010-06-24
Supplement: pgen.1000994.s005.pdf [file pgen.1000994.s005.pdf]

**Table S2. Primary screen.**

| Primary screen                       |           |      |      |             |
|--------------------------------------|-----------|------|------|-------------|
| Gene                                 | Amplicon  | -Z1  | -Z2  | Average - Z |
| HDC05561 ('+' in Hild et al)         | DRSC05209 | 13.3 | 12.4 | 12.9        |
| RpL15                                | DRSC20963 | 12.7 | 9.7  | 11.2        |
| HDC06418 ('+' in Hild et al)         | DRSC05498 | 9.2  | 11.2 | 10.2        |
| no hitter                            | DRSC01976 | 9.3  |      | 9.3         |
| HDC17524 ('+' in Hild et al)         | DRSC17394 | 9.4  | 8.8  | 9.1         |
| RpL19                                | DRSC04649 | 7.9  | 10.1 | 9.0         |
| HDC07108 ('+' in Stolc / Hild et al) | DRSC05715 | 8.5  | 9.3  | 8.9         |
| HDC07858 ('+' in Hild et al)         | DRSC07932 | 6.7  | 10.9 | 8.8         |
| Pdp1                                 | DRSC08897 | 8.6  |      | 8.6         |
| brahma                               | DRSC11330 | 7.8  | 9.1  | 8.5         |
| RpS26                                | DRSC03420 | 6.0  | 10.5 | 8.3         |
| HDC14318 ('+' in Hild et al)         | DRSC13298 | 11.4 | 5    | 8.2         |
| Pomp                                 | DRSC03201 | 6.7  | 9.5  | 8.1         |
| RpL21                                | DRSC03704 | 6.6  | 9.3  | 8.0         |
| CG10660                              | DRSC09769 | 7.3  | 8.6  | 8.0         |
| cyclophilin-33                       | DRSC07600 | 6.3  | 9.3  | 7.8         |
| hoi-polloi                           | DRSC03546 | 6.4  | 9.1  | 7.8         |
| RpL12                                | DRSC04344 | 6.3  | 9.2  | 7.8         |
| CG4174                               | DRSC10406 | 7.7  |      | 7.7         |
| HDC18812 ('+' in Hild et al)         | DRSC18999 | 7.7  | 7.6  | 7.7         |
| HDC15690 ('+' in Hild et al)         | DRSC13740 | 8.7  | 6.3  | 7.5         |
| RpL18                                | DRSC11016 | 5.1  | 9.9  | 7.5         |
| RpS12                                | DRSC11270 | 6.4  | 8.4  | 7.4         |
| MED11                                | DRSC10739 | 8.1  | 6.7  | 7.4         |
| CG4587                               | DRSC01956 | 7.4  |      | 7.4         |
| RpL26                                | DRSC10726 | 7.2  | 7.3  | 7.3         |
| RpL35A                               | DRSC12302 | 7.1  | 7.4  | 7.3         |
| RpL7                                 | DRSC03417 | 6.4  | 8    | 7.2         |
| RpL23                                | DRSC04648 | 6.5  | 7.9  | 7.2         |

|                              |           |     |     |     |
|------------------------------|-----------|-----|-----|-----|
| CG2807                       | DRSC00535 | 7.2 | 7.1 | 7.2 |
| RpS19a                       | DRSC20281 | 5.4 | 8.9 | 7.2 |
| Tbp-1                        | DRSC16842 | 5.7 | 8.5 | 7.1 |
| RpL8                         | DRSC08695 | 6.8 | 7.4 | 7.1 |
| RpL14                        | DRSC11269 | 6.0 | 8.2 | 7.1 |
| HDC12613 ('+' in Hild et al) | DRSC12723 | 5.0 | 9   | 7.0 |
| Pros26.4                     | DRSC16799 | 5.8 | 8.1 | 7.0 |
| HDC17815 ('+' in Hild et al) | DRSC17506 | 6.8 | 7.1 | 7.0 |
| eIF-4G                       | DRSC17218 | 6.0 | 7.8 | 6.9 |
| Rpn11                        | DRSC03422 | 6.6 | 7.2 | 6.9 |
| CG11985                      | DRSC14460 | 5.8 | 8   | 6.9 |
| RpL32                        | DRSC16835 | 5.6 | 8.2 | 6.9 |
| CG9119                       | DRSC08620 | 6.5 | 7.2 | 6.9 |
| RpL8                         | DRSC08532 | 6.2 | 7.5 | 6.9 |
| RpS9                         | DRSC11273 | 5.8 | 7.8 | 6.8 |
| eIF-4a                       | DRSC03526 | 5.0 | 8.6 | 6.8 |
| RpL10Ab                      | DRSC10798 | 7.1 | 6.5 | 6.8 |
| RpL22                        | DRSC18707 | 5.4 | 8   | 6.7 |
| quemao                       | DRSC11947 | 6.2 | 7.1 | 6.7 |
| RpS13                        | DRSC03419 | 5.4 | 7.8 | 6.6 |
| RpL38                        | DRSC07818 | 5.6 | 7.6 | 6.6 |
| Rpn7                         | DRSC16841 | 5.5 | 7.6 | 6.6 |
| RpL39                        | DRSC04651 | 7.0 | 6   | 6.5 |
| HDC12958                     | DRSC12832 | 7.2 | 5.8 | 6.5 |
| CG15278                      | DRSC02481 | 6.5 |     | 6.5 |
| RpS18                        | DRSC07540 | 5.1 | 7.8 | 6.5 |
| RpS4                         | DRSC11272 | 5.2 | 7.7 | 6.5 |
| RpS14b                       | DRSC18711 | 4.4 | 8.5 | 6.5 |
| RpS15Ab, RpS15Aa             | DRSC19831 | 4.2 | 8.7 | 6.5 |
| Dsp1                         | DRSC20315 | 5.8 | 7.1 | 6.5 |
| CG32000                      | DRSC17103 | 5.7 | 7.2 | 6.5 |
| RpL5                         | DRSC03801 | 5.4 | 7.4 | 6.4 |
| eIF3-S10                     | DRSC12339 | 5.4 | 7.4 | 6.4 |
| sima                         | DRSC17055 | 7.0 | 5.8 | 6.4 |
| RpL13                        | DRSC03416 | 4.0 | 8.8 | 6.4 |
| RpL27                        | DRSC15638 | 6.9 | 5.8 | 6.4 |
| CG9134                       | DRSC07954 | 6.3 |     | 6.3 |
| Trip1                        | DRSC03464 | 6.1 | 6.5 | 6.3 |
| RpL27A                       | DRSC00781 | 6.5 | 6.1 | 6.3 |
| CG3605                       | DRSC00619 | 5.8 | 6.6 | 6.2 |
| RpL4                         | DRSC16833 | 5.8 | 6.6 | 6.2 |
| CG18591                      | DRSC02680 | 5.6 | 6.8 | 6.2 |
| RpL3                         | DRSC16834 | 5.4 | 7   | 6.2 |

|                              |           |     |     |     |
|------------------------------|-----------|-----|-----|-----|
| RpL18A                       | DRSC07538 | 5.9 | 6.4 | 6.2 |
| HDC18154 ('+' in Hild et al) | DRSC17612 | 5.4 | 6.9 | 6.2 |
| RpL24                        | DRSC03185 | 5.1 | 7.1 | 6.1 |
| combgap                      | DRSC07650 | 7.1 | 5.1 | 6.1 |
| HDC07436 ('+' in Hild et al) | DRSC05853 | 5.7 | 6.5 | 6.1 |
| Mov34                        | DRSC04624 | 6.5 | 5.6 | 6.1 |
| pixie                        | DRSC10533 | 5.7 | 6.4 | 6.1 |
| Pros25                       | DRSC16798 | 4.7 | 7.4 | 6.1 |
| sop                          | DRSC03614 | 6.8 | 5.2 | 6.0 |
| arrest                       | DRSC01234 | 4.7 | 7.3 | 6.0 |
| CG8636                       | DRSC18427 | 5.5 | 6.4 | 6.0 |
| Rpn2                         | DRSC16839 | 5.8 | 6.1 | 6.0 |
| RpS7                         | DRSC15394 | 6.9 | 5   | 6.0 |
| Hsc70-4                      | DRSC16711 | 5.9 | 5.9 | 5.9 |
| RpL32                        | DRSC16835 | 6.6 | 5.2 | 5.9 |
| nucampholin                  | DRSC02179 | 7.9 | 3.8 | 5.9 |
| RpS5a                        | DRSC20282 | 4.7 | 7   | 5.9 |
| Ef2b                         | DRSC03737 | 5.2 | 6.5 | 5.9 |
| Rpn12                        | DRSC11275 | 4.6 | 7.1 | 5.9 |
| eIF3-p48/Int6                | DRSC11199 | 5.3 | 6.4 | 5.9 |
| Pros26                       | DRSC11256 | 5.3 | 6.3 | 5.8 |
| RpL17                        | DRSC18293 | 4.6 | 7   | 5.8 |
| eIF3-S8                      | DRSC06905 | 6.4 | 5.2 | 5.8 |
| RpS17                        | DRSC11271 | 5.6 | 6   | 5.8 |
| Rpt1                         | DRSC07542 | 6.4 | 5.1 | 5.8 |
| RpS6                         | DRSC18712 | 4.1 | 7.4 | 5.8 |
| RpS29                        | DRSC16433 | 5.2 | 6.3 | 5.8 |
| RpS3                         | DRSC16838 | 6.2 | 5.3 | 5.8 |
| Pros35                       | DRSC03401 | 6.1 | 5.3 | 5.7 |
| Prosbeta5                    | DRSC07517 | 5.2 | 6.2 | 5.7 |
| CG6694                       | DRSC10696 | 4.9 | 6.5 | 5.7 |
| RpS30                        | DRSC15119 | 7.6 | 3.8 | 5.7 |
| BarH2                        | DRSC19335 | 6.1 | 5.3 | 5.7 |
| nAcRalpha-96Aa               | DRSC13670 | 8.1 | 3.3 | 5.7 |
| CG15494                      | DRSC02502 | 5.7 |     | 5.7 |
| RpS15                        | DRSC07151 | 4.4 | 6.9 | 5.7 |
| RpLP2                        | DRSC07539 | 6.2 | 5.1 | 5.7 |
| RpS3A                        | DRSC17168 | 6.9 | 4.4 | 5.7 |
| SmB                          | DRSC03437 | 5.9 | 5.3 | 5.6 |
| RpS8                         | DRSC16318 | 6.2 | 5   | 5.6 |
| Prosalpha7                   | DRSC07516 | 5.8 | 5.3 | 5.6 |
| eIF-4E                       | DRSC11342 | 3.7 | 7.3 | 5.5 |
| CG30089                      | DRSC06127 | 4.7 | 6.3 | 5.5 |

|                                      |           |     |     |     |
|--------------------------------------|-----------|-----|-----|-----|
| RpL36                                | DRSC18708 | 5.8 | 5.2 | 5.5 |
| Rpn1                                 | DRSC11274 | 5.0 | 5.8 | 5.4 |
| RpL32                                | DRSC16835 | 5.2 | 5.6 | 5.4 |
| Prosbeta3                            | DRSC16801 | 4.6 | 6.1 | 5.4 |
| CG1161                               | DRSC12180 | 5.5 | 5.2 | 5.4 |
| RpL7A                                | DRSC18709 | 4.2 | 6.5 | 5.4 |
| Ataxin-2                             | DRSC15727 | 5.4 | 5.2 | 5.3 |
| CG13235                              | DRSC06355 | 5.6 | 5   | 5.3 |
| Rpt3                                 | DRSC20283 | 4.1 | 6.5 | 5.3 |
| CG9769                               | DRSC12328 | 5.4 | 5.1 | 5.3 |
| moira                                | DRSC15378 | 5.2 | 5.3 | 5.3 |
| HDC17859 ('+' in Hild et al)         | DRSC17532 | 6.8 | 3.7 | 5.3 |
| CG42400                              | DRSC02458 | 4.3 | 6.2 | 5.3 |
| p130CAS                              | DRSC08257 | 5.5 | 4.9 | 5.2 |
| NSL1                                 | DRSC15625 | 4.8 | 5.6 | 5.2 |
| seven up                             | DRSC15311 | 6.0 | 4.4 | 5.2 |
| Dox-A2                               | DRSC03318 | 4.6 | 5.7 | 5.2 |
| RpL35                                | DRSC18347 | 3.9 | 6.4 | 5.2 |
| Helicase at 25E                      | DRSC03342 | 5.1 | 5.1 | 5.1 |
| RpL9                                 | DRSC03418 | 5.7 | 4.5 | 5.1 |
| RpS14a                               | DRSC18710 | 4.6 | 5.6 | 5.1 |
| CG15097                              | DRSC06526 | 5.1 | 5   | 5.1 |
| Prosbeta2                            | DRSC11257 | 4.3 | 5.8 | 5.1 |
| RpS15Ab, RpS15Aa                     | DRSC06129 | 3.3 | 6.8 | 5.1 |
| RpL31                                | DRSC06716 | 4.8 | 5.3 | 5.1 |
| RpL18                                | DRSC12366 | 5.5 | 4.6 | 5.1 |
| eIF3-S9                              | DRSC06900 | 5.1 | 4.9 | 5.0 |
| ran                                  | DRSC20364 | 4.2 | 5.8 | 5.0 |
| HDC09524 ('+' in Hild et al)         | DRSC09077 | 4.4 | 5.6 | 5.0 |
| HDC17206 ('+' in Stolc / Hild et al) | DRSC17248 | 6.0 | 4   | 5.0 |
| oho23B                               | DRSC00833 | 4.6 | 5.4 | 5.0 |
| RpL40                                | DRSC00782 | 5.0 | 4.9 | 5.0 |
| eIF-3p66                             | DRSC16938 | 5.1 | 4.8 | 5.0 |
| DebB                                 | DRSC07397 | 5.0 | 4.8 | 4.9 |
| Rrp6                                 | DRSC16223 | 4.2 | 5.6 | 4.9 |
| Cyclin E                             | DRSC03296 | 4.4 | 5.4 | 4.9 |
| Rpb5                                 | DRSC06100 | 4.0 | 5.8 | 4.9 |
| Rpt4                                 | DRSC18713 | 4.9 | 4.9 | 4.9 |
| CG5931                               | DRSC10559 | 4.1 | 5.6 | 4.9 |
| thread                               | DRSC11404 | 4.9 | 4.8 | 4.9 |
| SmD3                                 | DRSC07553 | 3.9 | 5.8 | 4.9 |
| dos                                  | DRSC07992 | 5.3 | 4.4 | 4.9 |
| abdominal A                          | DRSC16897 | 5.0 | 4.6 | 4.8 |

|                                      |           |     |     |     |
|--------------------------------------|-----------|-----|-----|-----|
| RpS20                                | DRSC16836 | 5.8 | 3.8 | 4.8 |
| HDC02682 ('+' in Hild et al)         | DRSC01481 | 6.1 | 3.5 | 4.8 |
| squid                                | DRSC17066 | 4.8 |     | 4.8 |
| CG13550                              | DRSC04191 | 4.5 | 5   | 4.8 |
| CG14459                              | DRSC11719 | 5.3 | 4.2 | 4.8 |
| raptor                               | DRSC18359 | 4.7 |     | 4.7 |
| double parked                        | DRSC07088 | 4.9 | 4.5 | 4.7 |
| CG42342                              | DRSC14378 | 4.2 | 5.2 | 4.7 |
| prp8                                 | DRSC07293 | 5.3 | 4.1 | 4.7 |
| CG7065                               | DRSC18420 | 3.6 | 5.7 | 4.7 |
| eIF-5A                               | DRSC04681 | 4.5 | 4.8 | 4.7 |
| RpL28                                | DRSC08293 | 4.8 | 4.5 | 4.7 |
| RpS28b                               | DRSC18258 | 4.6 | 4.6 | 4.6 |
| CG12912                              | DRSC06227 | 4.5 | 4.7 | 4.6 |
| HDC16553 ('+' in Hild et al)         | DRSC14046 | 4.6 | 4.6 | 4.6 |
| CG16941                              | DRSC15166 | 3.7 | 5.4 | 4.6 |
| murashka                             | DRSC16484 | 4.2 | 4.9 | 4.6 |
| Tango7                               | DRSC07142 | 5.2 | 3.8 | 4.5 |
| Rpn6                                 | DRSC07541 | 4.0 | 5   | 4.5 |
| lethal(2)05070                       | DRSC07159 | 5.4 | 3.6 | 4.5 |
| CG17331                              | DRSC02603 | 4.6 | 4.4 | 4.5 |
| CG17836                              | DRSC15282 | 4.9 | 4.1 | 4.5 |
| HDC09397 ('+' in Stolc / Hild et al) | DRSC09009 | 6.6 | 2.4 | 4.5 |
| CG5482                               | DRSC06936 | 6.1 | 2.8 | 4.5 |
| CG8929                               | DRSC07298 | 3.8 | 5.1 | 4.5 |
| Prosbeta4                            | DRSC12186 | 4.5 | 4.4 | 4.5 |
| Ken and Barbie                       | DRSC04696 | 5.8 | 3   | 4.4 |
| CG4849                               | DRSC15662 | 5.0 | 3.8 | 4.4 |
| CG17304                              | DRSC15222 | 4.7 | 4.1 | 4.4 |
| CG15450                              | DRSC20522 | 4.6 | 4.2 | 4.4 |
| Spt6                                 | DRSC18836 | 4.0 | 4.8 | 4.4 |
| HDC07396 ('+' in Hild et al)         | DRSC05818 | 3.4 | 5.4 | 4.4 |
| AGO1                                 | DRSC05912 | 6.1 | 2.6 | 4.4 |
| RpII215                              | DRSC20280 | 3.5 | 5.2 | 4.4 |
| chinmo                               | DRSC00509 | 3.6 | 5.1 | 4.4 |
| Nup98                                | DRSC14210 | 4.1 | 4.6 | 4.4 |
| CG30382                              | DRSC07515 | 4.2 | 4.4 | 4.3 |
| RpS16                                | DRSC04442 | 4.5 | 4.1 | 4.3 |
| CG12897                              | DRSC06212 | 3.4 | 5.2 | 4.3 |
| SF2                                  | DRSC16845 | 3.2 | 5.4 | 4.3 |
| HDC01261 ('+' in Stolc / Hild et al) | DRSC00977 | 2.9 | 5.7 | 4.3 |
| HDC02560 ('+' in Hild et al)         | DRSC01970 | 3.6 | 5   | 4.3 |
| CSN6                                 | DRSC16593 | 4.3 |     | 4.3 |

|                                      |           |     |     |     |
|--------------------------------------|-----------|-----|-----|-----|
| Jon99Ciii                            | DRSC16859 | 4.3 |     | 4.3 |
| AdoR                                 | DRSC16556 | 4.3 |     | 4.3 |
| crooked-neck                         | DRSC18755 | 3.9 | 4.7 | 4.3 |
| cdc2                                 | DRSC03504 | 4.0 | 4.5 | 4.3 |
| Patj                                 | DRSC08712 | 4.0 | 4.5 | 4.3 |
| Suv4-20                              | DRSC18482 | 3.9 | 4.6 | 4.3 |
| snRNP69D                             | DRSC09800 | 5.7 | 2.7 | 4.2 |
| TER94                                | DRSC07560 | 4.5 | 3.9 | 4.2 |
| Bx42                                 | DRSC17743 | 4.9 | 3.5 | 4.2 |
| Nup153                               | DRSC19904 | 2.9 | 5.5 | 4.2 |
| CG32365                              | DRSC10041 | 3.7 | 4.7 | 4.2 |
| CG4328                               | DRSC10410 | 4.6 | 3.8 | 4.2 |
| pontin                               | DRSC17029 | 4.5 | 3.9 | 4.2 |
| ascutex                              | DRSC05924 | 2.7 | 5.7 | 4.2 |
| HDC19639 ('+' in Stolc / Hild et al) | DRSC19272 | 3.1 | 5.3 | 4.2 |
| orb                                  | DRSC17021 | 4.5 | 3.8 | 4.2 |
| Nup153                               | DRSC19904 | 5.5 | 2.8 | 4.2 |
| RpL30                                | DRSC02087 | 3.7 | 4.6 | 4.2 |
| reptin                               | DRSC11388 | 5.1 | 3.2 | 4.2 |
| small bristles                       | DRSC20368 | 4.2 | 4.1 | 4.2 |
| CG7757                               | DRSC10912 | 5.1 | 3.2 | 4.2 |
| CG33967                              | DRSC16257 | 4.7 | 3.6 | 4.2 |
| HDC13910                             | DRSC13145 | 4.1 | 4.2 | 4.2 |
| HDC15172 ('+' in Hild et al)         | DRSC13607 | 6.3 | 2.0 | 4.2 |
| CG32606                              | DRSC19001 | 6.4 | 1.9 | 4.2 |
| tango                                | DRSC17077 | 3.3 | 4.8 | 4.1 |
| Bap60                                | DRSC19337 | 3.8 | 4.4 | 4.1 |
| Slu7                                 | DRSC14729 | 3.7 | 4.5 | 4.1 |
| CG4266                               | DRSC04456 | 4.1 | 4.1 | 4.1 |
| Tango4                               | DRSC19786 | 3.9 | 4.3 | 4.1 |
| CG13298                              | DRSC09972 | 3.3 | 4.9 | 4.1 |
| CG7918                               | DRSC16345 | 5.9 | 2.2 | 4.1 |
| HDC03687 ('+' in Hild et al)         | DRSC03744 | 5.3 | 2.9 | 4.1 |
| Trn-SR                               | DRSC00546 | 3.7 | 4.4 | 4.1 |
| CG17742                              | DRSC10285 | 5.3 | 2.8 | 4.1 |
| Su(var)3-9                           | DRSC13081 | 4.0 | 4.1 | 4.1 |
| eIF-1A                               | DRSC16937 | 4.7 | 3.4 | 4.1 |
| His3:CG31613                         | DRSC21267 | 5.9 | 2.2 | 4.1 |
| starry night                         | DRSC05234 | 4.1 | 4   | 4.1 |
| ph-d                                 | DRSC18819 | 4.0 |     | 4.0 |
| CG14641                              | DRSC12227 | 3.1 | 4.9 | 4.0 |
| RpLP1                                | DRSC00783 | 4.8 | 3.2 | 4.0 |
| CG13165                              | DRSC06292 | 4.2 | 3.8 | 4.0 |

|                                      |           |     |     |     |
|--------------------------------------|-----------|-----|-----|-----|
| CG13675                              | DRSC10034 | 4.1 | 3.9 | 4.0 |
| RpII15                               | DRSC16832 | 3.7 | 4.3 | 4.0 |
| CG4325                               | DRSC18516 | 4.3 | 3.7 | 4.0 |
| CG14180                              | DRSC10179 | 4.0 | 3.9 | 4.0 |
| CG34139                              | DRSC15701 | 4.0 |     | 4.0 |
| CG6197                               | DRSC06967 | 4.1 | 3.8 | 4.0 |
| CG1542                               | DRSC15035 | 4.8 | 3.2 | 4.0 |
| Nup153                               | DRSC19904 | 2.8 | 5.1 | 4.0 |
| Pvf2                                 | DRSC00968 | 2.6 | 5.2 | 3.9 |
| Calx                                 | DRSC13457 | 3.9 |     | 3.9 |
| Neosin                               | DRSC11235 | 3.5 | 4.3 | 3.9 |
| RpL36A                               | DRSC03055 | 4.3 | 3.5 | 3.9 |
| Ef1alpha48D                          | DRSC07421 | 3.5 | 4.3 | 3.9 |
| CG14952                              | DRSC08412 | 3.9 | 3.9 | 3.9 |
| HDC03105 ('+' in Hild et al)         | DRSC01651 | 3.9 |     | 3.9 |
| ind                                  | DRSC11355 | 3.0 | 4.8 | 3.9 |
| Rheb                                 | DRSC12148 | 3.0 | 4.7 | 3.9 |
| CG14995                              | DRSC08452 | 4.6 | 3.1 | 3.9 |
| MED25                                | DRSC14483 | 4.4 | 3.3 | 3.9 |
| HDC05695                             | DRSC06151 | 3.9 | 3.8 | 3.9 |
| Cpr47Ee                              | DRSC06343 | 5.1 | 2.6 | 3.9 |
| unc-13-4A                            | DRSC10203 | 4.0 | 3.7 | 3.9 |
| stubarista                           | DRSC18838 | 3.8 | 3.9 | 3.9 |
| CG30126                              | DRSC05769 | 3.6 | 4.1 | 3.9 |
| HDC11530                             | DRSC11566 | 4.9 | 2.8 | 3.9 |
| smt3                                 | DRSC03611 | 4.5 | 3.1 | 3.8 |
| Fs(2)Ket                             | DRSC03328 | 3.9 | 3.7 | 3.8 |
| gawky                                | DRSC17160 | 4.8 | 2.8 | 3.8 |
| CR11700                              | DRSC17794 | 3.9 | 3.7 | 3.8 |
| CG8179                               | DRSC07091 | 4.8 | 2.8 | 3.8 |
| CG12499                              | DRSC14521 | 3.8 |     | 3.8 |
| Chrac-16                             | DRSC20343 | 3.8 |     | 3.8 |
| U2af50                               | DRSC20297 | 3.5 | 4   | 3.8 |
| HDC05705 ('+' in Stolc / Hild et al) | DRSC06353 | 3.7 | 3.8 | 3.8 |
| diminutive                           | DRSC18762 | 4.7 | 2.8 | 3.8 |
| HDC10026                             | DRSC09271 | 2.8 | 4.7 | 3.8 |
| HDC14006                             | DRSC13177 | 4.3 | 3.2 | 3.8 |
| Rdh                                  | DRSC08434 | 5.0 | 2.5 | 3.8 |
| HDC12966 ('+' in Hild et al)         | DRSC14922 | 3.8 | 3.7 | 3.8 |
| Pvr                                  | DRSC03080 | 2.9 | 4.5 | 3.7 |
| bruno-2                              | DRSC02557 | 2.8 | 4.6 | 3.7 |
| bric a brac 1                        | DRSC08379 | 3.0 | 4.4 | 3.7 |
| minibrain                            | DRSC20058 | 2.7 | 4.7 | 3.7 |

|                                      |           |     |     |     |
|--------------------------------------|-----------|-----|-----|-----|
| blistered                            | DRSC04676 | 4.4 | 3   | 3.7 |
| HDC02560 ('+' in Hild et al)         | DRSC01970 | 3.7 | 3.6 | 3.7 |
| Pros29                               | DRSC04644 | 4.0 | 3.3 | 3.7 |
| RpS24                                | DRSC04414 | 5.9 | 1.4 | 3.7 |
| Ef1gamma                             | DRSC16659 | 2.8 | 4.5 | 3.7 |
| l(3)03670                            | DRSC16981 | 3.6 |     | 3.6 |
| stumps                               | DRSC15332 | 5.3 | 1.9 | 3.6 |
| Rtf1                                 | DRSC04085 | 3.8 | 3.4 | 3.6 |
| HDC05705 ('+' in Stolc / Hild et al) | DRSC06353 | 3.5 | 3.7 | 3.6 |
| split thorax                         | DRSC18720 | 2.6 | 4.6 | 3.6 |
| HDC07387 ('+' in Hild et al)         | DRSC05810 | 4.3 | 2.9 | 3.6 |
| HDC09490 ('+' in Hild et al)         | DRSC09057 | 5.1 | 2.1 | 3.6 |
| CG31395                              | DRSC12788 | 6.6 | 0.6 | 3.6 |
| RpS10b                               | DRSC19561 | 5.1 | 2.1 | 3.6 |
| CG32772                              | DRSC18052 | 4.6 | 2.6 | 3.6 |
| Cyclin T                             | DRSC11124 | 4.2 | 2.9 | 3.6 |
| His4r                                | DRSC16703 | 3.3 | 3.8 | 3.6 |
| Tcp1-like                            | DRSC16877 | 4.5 | 2.6 | 3.6 |
| CG32335                              | DRSC07948 | 4.5 | 2.6 | 3.6 |
| rab3-GEF                             | DRSC19956 | 3.5 |     | 3.5 |
| hook                                 | DRSC18674 | 3.5 |     | 3.5 |
| l(1)10Bb                             | DRSC20346 | 3.8 | 3.1 | 3.5 |
| RpL13A                               | DRSC12265 | 3.5 | 3.5 | 3.5 |
| E2f                                  | DRSC16655 | 4.1 | 2.9 | 3.5 |
| E23                                  | DRSC00425 | 4.0 | 2.9 | 3.5 |
| Pabp2                                | DRSC07501 | 2.5 | 4.4 | 3.5 |
| CG9164                               | DRSC19087 | 3.2 | 3.7 | 3.5 |
| CG34422                              | DRSC20029 | 3.2 | 3.7 | 3.5 |
| Camta                                | DRSC06441 | 4.2 | 2.6 | 3.4 |
| CG10927                              | DRSC06014 | 3.2 | 3.6 | 3.4 |
| RpS23                                | DRSC07169 | 3.3 | 3.5 | 3.4 |
| fru                                  | DRSC16951 | 3.4 |     | 3.4 |
| RpL37A                               | DRSC02899 | 4.2 | 2.6 | 3.4 |
| luna                                 | DRSC06663 | 3.7 | 3.1 | 3.4 |
| scruff                               | DRSC12604 | 4.8 | 2.0 | 3.4 |
| CG31179                              | DRSC13494 | 3.4 |     | 3.4 |
| CG12470                              | DRSC18620 | 3.4 |     | 3.4 |
| CG42389                              | DRSC02245 | 3.9 | 2.9 | 3.4 |
| CG12484                              | DRSC05883 | 3.0 | 3.8 | 3.4 |
| CG32062                              | DRSC10157 | 5.0 | 1.8 | 3.4 |
| RpS27A                               | DRSC03421 | 3.0 | 3.7 | 3.4 |
| Proctolin                            | DRSC03009 | 5.1 | 1.6 | 3.4 |
| CG9253                               | DRSC03171 | 4.2 | 2.5 | 3.4 |



|                                      |           |     |     |     |
|--------------------------------------|-----------|-----|-----|-----|
| RpS27                                | DRSC14244 | 5.1 | 1.6 | 3.4 |
| A3-3                                 | DRSC17225 | 3.5 | 3.2 | 3.4 |
| HDC10243 ('+' in Hild et al)         | DRSC09354 | 3.2 | 3.5 | 3.4 |
| RpII33                               | DRSC03415 | 3.0 | 3.6 | 3.3 |
| homeobrain                           | DRSC04082 | 4.0 | 2.6 | 3.3 |
| CG30460                              | DRSC06560 | 4.2 | 2.4 | 3.3 |
| CG17329                              | DRSC01926 | 3.3 |     | 3.3 |
| Furin 1                              | DRSC13707 | 3.2 | 3.4 | 3.3 |
| Tektin-C                             | DRSC09741 | 3.0 | 3.6 | 3.3 |
| HDC09523 ('+' in Stolc / Hild et al) | DRSC09076 | 4.5 | 2.1 | 3.3 |
| CG4570                               | DRSC15602 | 4.1 | 2.4 | 3.3 |
| Alhambra                             | DRSC12447 | 3.3 |     | 3.3 |
| CG9007                               | DRSC11051 | 3.8 | 2.7 | 3.3 |
| Snr1                                 | DRSC12369 | 3.2 | 3.3 | 3.3 |
| noisette                             | DRSC12383 | 3.2 | 3.3 | 3.3 |
| CG32776                              | DRSC18119 | 4.6 | 1.9 | 3.3 |
| rutabaga                             | DRSC20367 | 4.4 | 2.1 | 3.3 |
| Sox100B                              | DRSC15090 | 3.2 |     | 3.2 |
| Rrp45                                | DRSC20198 | 3.2 |     | 3.2 |
| CG11138                              | DRSC19385 | 3.2 |     | 3.2 |
| Cdc27                                | DRSC11112 | 2.8 | 3.6 | 3.2 |
| mei-P26                              | DRSC17735 | 3.8 | 2.6 | 3.2 |
| Hey                                  | DRSC07440 | 5.2 | 1.2 | 3.2 |
| CG32306                              | DRSC08333 | 4.2 | 2.2 | 3.2 |
| msopa                                | DRSC11895 | 4.5 | 1.9 | 3.2 |
| RpL6                                 | DRSC14323 | 4.2 | 2.2 | 3.2 |
| HDC17386                             | DRSC17342 | 3.4 | 3   | 3.2 |
| bhringi                              | DRSC11000 | 3.1 | 3.3 | 3.2 |
| CG3436                               | DRSC00605 | 4.2 | 2.1 | 3.2 |
| CG3983                               | DRSC15529 | 5.0 | 1.3 | 3.2 |
| shrub                                | DRSC07061 | 3.4 | 2.9 | 3.2 |
| RpII140                              | DRSC16831 | 3.3 | 3   | 3.2 |
| canoe                                | DRSC12374 | 4.6 | 1.7 | 3.2 |
| thisbe                               | DRSC06153 | 4.6 | 1.7 | 3.2 |
| alphaTub85E                          | DRSC16899 | 3.5 | 2.8 | 3.2 |
| HDC08349 ('+' in Hild et al)         | DRSC08080 | 4.2 | 2.1 | 3.2 |
| HDC09253 ('+' in Hild et al)         | DRSC08978 | 2.8 | 3.5 | 3.2 |
| CG31461                              | DRSC13113 | 2.5 | 3.8 | 3.2 |
| CG14543                              | DRSC14887 | 3.1 |     | 3.1 |
| RnrL                                 | DRSC03413 | 2.7 | 3.5 | 3.1 |
| antimeros                            | DRSC12310 | 3.8 | 2.4 | 3.1 |
| CG6937                               | DRSC16140 | 3.4 | 2.8 | 3.1 |
| Rpb7                                 | DRSC16068 | 2.7 | 3.5 | 3.1 |

|                                      |           |     |     |     |
|--------------------------------------|-----------|-----|-----|-----|
| CG31847                              | DRSC02535 | 2.9 | 3.3 | 3.1 |
| Rgk1                                 | DRSC07344 | 2.7 | 3.5 | 3.1 |
| HDC13476 ('+' in Hild et al)         | DRSC12996 | 3.2 | 3   | 3.1 |
| D19A                                 | DRSC11133 | 3.5 | 2.6 | 3.1 |
| U2af38                               | DRSC00796 | 3.2 | 2.9 | 3.1 |
| cropped                              | DRSC03515 | 2.7 | 3.4 | 3.1 |
| Mrtf                                 | DRSC08263 | 4.1 | 2.0 | 3.1 |
| HDC07103 ('+' in Hild et al)         | DRSC05711 | 4.2 | 1.9 | 3.1 |
| CG31353                              | DRSC13530 | 5.8 | 0.3 | 3.1 |
| translucent                          | DRSC11308 | 4.5 | 1.5 | 3.0 |
| CG2446                               | DRSC19847 | 3.0 |     | 3.0 |
| CG2685                               | DRSC18463 | 3.0 |     | 3.0 |
| CG9777                               | DRSC20208 | 3.0 |     | 3.0 |
| Rbm13                                | DRSC17749 | 3.0 |     | 3.0 |
| Cbp20                                | DRSC16601 | 3.0 |     | 3.0 |
| snRNP2                               | DRSC12536 | 2.8 | 3.2 | 3.0 |
| His2B:CG17949                        | DRSC03757 | 3.3 | 2.7 | 3.0 |
| HDC19527 ('+' in Hild et al)         | DRSC19637 | 4.0 | 2.0 | 3.0 |
| CG15630                              | DRSC00465 | 3.7 | 2.2 | 3.0 |
| l(2)35Df                             | DRSC03560 | 3.6 | 2.3 | 3.0 |
| roadkill                             | DRSC14526 | 3.4 | 2.5 | 3.0 |
| CG31475                              | DRSC14762 | 3.4 | 2.5 | 3.0 |
| Clipper                              | DRSC00746 | 2.9 | 3   | 3.0 |
| CG10754                              | DRSC09801 | 2.7 | 3.2 | 3.0 |
| His-Psi:CR31615/CR31616              | DRSC03760 | 3.3 | 2.6 | 3.0 |
| HDC05639 ('+' in Hild et al)         | DRSC05231 | 3.1 | 2.8 | 3.0 |
| HDC07480 ('+' in Stolc / Hild et al) | DRSC05871 | 5.2 | 0.7 | 3.0 |
| Sec61alpha                           | DRSC03256 | 3.7 | 2.1 | 2.9 |
| Spt5                                 | DRSC07556 | 3.6 | 2.2 | 2.9 |
| TweedleN                             | DRSC15813 | 2.9 |     | 2.9 |
| CG4218                               | DRSC01939 | 2.9 |     | 2.9 |
| HLH106                               | DRSC11182 | 3.5 | 2.3 | 2.9 |
| CG15470                              | DRSC18053 | 4.1 | 1.7 | 2.9 |
| HDC13798                             | DRSC13109 | 3.1 | 2.7 | 2.9 |
| RpS11                                | DRSC07289 | 3.8 | 2.0 | 2.9 |
| sine oculis                          | DRSC07693 | 3.1 | 2.7 | 2.9 |
| Ef1alpha100E                         | DRSC16658 | 2.9 |     | 2.9 |
| CG32970                              | DRSC01375 | 2.9 |     | 2.9 |
| Fasciclin 2                          | DRSC17308 | 2.9 |     | 2.9 |
| CG12278                              | DRSC14494 | 2.9 |     | 2.9 |
| Cdc42                                | DRSC20228 | 3.3 | 2.4 | 2.9 |
| CG6509                               | DRSC02964 | 2.8 | 2.9 | 2.9 |
| Nup98                                | DRSC14209 | 3.6 | 2.0 | 2.8 |

|                              |           |     |     |     |
|------------------------------|-----------|-----|-----|-----|
| peanuts                      | DRSC07120 | 3.2 | 2.4 | 2.8 |
| CG32043                      | DRSC10330 | 4.3 | 1.3 | 2.8 |
| bluecheese                   | DRSC02333 | 3.2 | 2.4 | 2.8 |
| Dim1                         | DRSC00563 | 3.0 | 2.6 | 2.8 |
| CG3563                       | DRSC13053 | 2.9 | 2.7 | 2.8 |
| beat-IIb                     | DRSC13219 | 2.8 |     | 2.8 |
| MED28                        | DRSC15721 | 2.8 |     | 2.8 |
| couch potato                 | DRSC14503 | 2.8 |     | 2.8 |
| anterior open                | DRSC00801 | 4.6 | 0.9 | 2.8 |
| Cpr66D                       | DRSC10646 | 3.9 | 1.6 | 2.8 |
| CG9426                       | DRSC03219 | 3.6 | 1.9 | 2.8 |
| MBD-R2                       | DRSC14180 | 3.1 | 2.4 | 2.8 |
| Beadex                       | DRSC19350 | 2.6 | 2.9 | 2.8 |
| CSN3                         | DRSC11859 | 3.4 | 2.0 | 2.7 |
| CG31145                      | DRSC14670 | 4.6 | 0.8 | 2.7 |
| Tim9b                        | DRSC19566 | 3.1 | 2.3 | 2.7 |
| MED22                        | DRSC18175 | 2.7 |     | 2.7 |
| CG15365                      | DRSC18038 | 4.0 | 1.4 | 2.7 |
| Tim17b2                      | DRSC03457 | 2.7 |     | 2.7 |
| HDC17481 ('+' in Hild et al) | DRSC17379 | 3.9 | 1.5 | 2.7 |
| Nepriylsin 1                 | DRSC18389 | 2.7 |     | 2.7 |
| warts                        | DRSC17096 | 4.3 | 1.0 | 2.7 |
| NF-YC-like                   | DRSC18272 | 3.9 | 1.4 | 2.7 |
| HDC18875 ('+' in Hild et al) | DRSC19029 | 3.2 | 2.1 | 2.7 |
| CG31229                      | DRSC13309 | 2.9 | 2.2 | 2.6 |
| dalao                        | DRSC18419 | 2.9 | 2.2 | 2.6 |
| Smrter                       | DRSC19495 | 3.8 | 1.4 | 2.6 |
| CG18375                      | DRSC04305 | 2.7 | 2.5 | 2.6 |
| CG4959                       | DRSC01938 | 2.6 |     | 2.6 |
| CG5732                       | DRSC15863 | 2.6 |     | 2.6 |
| CG30127                      | DRSC05786 | 2.6 |     | 2.6 |
| vrille                       | DRSC03633 | 4.6 | 0.6 | 2.6 |
| mRNA-capping-enzyme          | DRSC19789 | 3.2 | 2.0 | 2.6 |
| HDC08744 ('+' in Hild et al) | DRSC08800 | 3.8 | 1.4 | 2.6 |
| Symplekin                    | DRSC12301 | 2.8 | 2.4 | 2.6 |
| foxo                         | DRSC13017 | 3.2 | 2.0 | 2.6 |
| HDC17467 ('+' in Hild et al) | DRSC17370 | 3.1 | 2.1 | 2.6 |
| Rpb8                         | DRSC11642 | 2.7 | 2.4 | 2.6 |
| CG3918                       | DRSC18331 | 3.7 | 1.4 | 2.6 |
| CG5739                       | DRSC02885 | 3.1 | 2.0 | 2.6 |
| CG4830                       | DRSC15657 | 3.1 | 2.0 | 2.6 |
| CG12454                      | DRSC19458 | 3.7 | 1.4 | 2.6 |
| HDC05227 ('+' in Hild et al) | DRSC05108 | 2.5 | 2.6 | 2.6 |

|                                      |           |     |      |     |
|--------------------------------------|-----------|-----|------|-----|
| HDC08028                             | DRSC07960 | 2.9 | 2.2  | 2.6 |
| spn-F                                | DRSC14475 | 2.8 | 2.3  | 2.6 |
| Rbp2                                 | DRSC20276 | 2.9 | 2.2  | 2.6 |
| cut                                  | DRSC18757 | 2.8 | 2.1  | 2.5 |
| l(2)k09022                           | DRSC02108 | 3.8 | 1.2  | 2.5 |
| CG14023                              | DRSC02353 | 2.9 | 2.1  | 2.5 |
| Su(Tpl)                              | DRSC10954 | 2.8 | 2.2  | 2.5 |
| CG8885                               | DRSC03117 | 2.8 | 2.2  | 2.5 |
| CG13278                              | DRSC02252 | 2.5 |      | 2.5 |
| CG7532                               | DRSC01910 | 2.5 |      | 2.5 |
| Su(z)2                               | DRSC07558 | 3.0 | 2.0  | 2.5 |
| eyegone                              | DRSC11344 | 3.3 | 1.7  | 2.5 |
| HDC14033                             | DRSC13200 | 2.7 | 2.3  | 2.5 |
| Hsp83                                | DRSC08664 | 2.7 | 2.2  | 2.5 |
| CG7597                               | DRSC11836 | 2.5 | 2.4  | 2.5 |
| CG2865                               | DRSC18528 | 2.8 | 2.1  | 2.5 |
| smG                                  | DRSC20207 | 2.9 | 2.0  | 2.5 |
| HDC01635                             | DRSC01082 | 2.8 | 2.1  | 2.5 |
| HDC10238                             | DRSC09350 | 2.6 | 2.3  | 2.5 |
| HDC12272                             | DRSC12455 | 2.6 | 2.3  | 2.5 |
| Stam                                 | DRSC03444 | 2.6 | 2.2  | 2.4 |
| pUf68                                | DRSC08731 | 3.4 | 1.4  | 2.4 |
| CG12054                              | DRSC14467 | 2.6 | 2.2  | 2.4 |
| Tor                                  | DRSC02811 | 2.8 | 2.0  | 2.4 |
| serpent                              | DRSC17068 | 2.7 | 2.1  | 2.4 |
| CG4615                               | DRSC18376 | 3.0 | 1.7  | 2.4 |
| CG5466                               | DRSC15808 | 3.7 | 1.1  | 2.4 |
| CG15740                              | DRSC19706 | 2.8 | 2.0  | 2.4 |
| dpr6                                 | DRSC09005 | 3.9 | 0.9  | 2.4 |
| Hsp70Ab                              | DRSC15380 | 2.9 | 1.8  | 2.4 |
| hyrax                                | DRSC14462 | 2.7 | 2.0  | 2.4 |
| CG5844                               | DRSC15890 | 2.5 | 2.2  | 2.4 |
| HDC02165 ('+' in Hild et al)         | DRSC01243 | 3.0 | 1.7  | 2.4 |
| HDC02637 ('+' in Hild et al)         | DRSC01452 | 2.7 | 2.0  | 2.4 |
| HDC04273 ('+' in Stolc / Hild et al) | DRSC03998 | 2.7 | 2.0  | 2.4 |
| HDC13786                             | DRSC13099 | 2.5 | 2.2  | 2.4 |
| Fatty acid synthetase                | DRSC00268 | 2.6 | 2.0  | 2.3 |
| Neurocalcin                          | DRSC07022 | 2.5 | 2.1  | 2.3 |
| PDK1                                 | DRSC08682 | 3.0 | 1.5  | 2.3 |
| Eip74EF                              | DRSC10613 | 3.3 | 1.3  | 2.3 |
| HDC15185                             | DRSC14674 | 5.2 | -0.6 | 2.3 |
| CG33110                              | DRSC14694 | 3.5 | 1.1  | 2.3 |
| HDC14620 ('+' in Stolc / Hild et al) | DRSC13410 | 5.0 | -0.4 | 2.3 |

|                                      |           |     |      |     |
|--------------------------------------|-----------|-----|------|-----|
| CG12650                              | DRSC17609 | 2.8 | 1.8  | 2.3 |
| HDC08749 ('+' in Hild et al)         | DRSC08805 | 2.8 | 1.8  | 2.3 |
| CG31705                              | DRSC01991 | 2.9 | 1.6  | 2.3 |
| bunched                              | DRSC03500 | 2.7 | 1.8  | 2.3 |
| Klp61F                               | DRSC08671 | 2.7 | 1.8  | 2.3 |
| pgant6                               | DRSC08552 | 2.7 | 1.8  | 2.3 |
| CSN7                                 | DRSC06807 | 2.5 | 2.0  | 2.3 |
| CG15753                              | DRSC19718 | 4.6 | -0.1 | 2.3 |
| CG42270                              | DRSC19967 | 2.8 | 1.7  | 2.3 |
| HDC09080 ('+' in Hild et al)         | DRSC08919 | 5.6 | -1.1 | 2.3 |
| HDC18214 ('+' in Hild et al)         | DRSC17632 | 2.7 | 1.8  | 2.3 |
| dre4                                 | DRSC08714 | 3.7 | 0.7  | 2.2 |
| CG13779                              | DRSC02282 | 3.1 | 1.3  | 2.2 |
| CG6043                               | DRSC02922 | 3.5 | 0.9  | 2.2 |
| CG34113                              | DRSC12263 | 3.1 | 1.3  | 2.2 |
| Hexokinase C                         | DRSC07079 | 2.8 | 1.6  | 2.2 |
| TORC                                 | DRSC10578 | 4.1 | 0.3  | 2.2 |
| alphaTub84B                          | DRSC12622 | 2.8 | 1.6  | 2.2 |
| CG6015                               | DRSC15948 | 2.7 | 1.7  | 2.2 |
| CG34354                              | DRSC14558 | 4.3 | 0.1  | 2.2 |
| Hsp70Bb                              | DRSC21248 | 2.7 | 1.7  | 2.2 |
| HDC05820 ('+' in Stolc / Hild et al) | DRSC05297 | 2.8 | 1.6  | 2.2 |
| snRNA:U1:95Cc                        | DRSC13640 | 4.2 | 0.2  | 2.2 |
| Cct5                                 | DRSC07357 | 3.5 | 0.8  | 2.2 |
| muscleblind                          | DRSC07651 | 2.9 | 1.4  | 2.2 |
| alphaTub84D                          | DRSC12623 | 3.5 | 0.8  | 2.2 |
| HDC18498 ('+' in Stolc / Hild et al) | DRSC19661 | 3.7 | 0.6  | 2.2 |
| araucan                              | DRSC11322 | 3.0 | 1.2  | 2.1 |
| CG30387                              | DRSC04256 | 3.3 | 0.8  | 2.1 |
| Mlf                                  | DRSC07472 | 3.4 | 0.7  | 2.1 |
| CG14982                              | DRSC08440 | 3.2 | 0.9  | 2.1 |
| Tie                                  | DRSC08702 | 2.8 | 1.3  | 2.1 |
| CG3982                               | DRSC10394 | 2.8 | 1.3  | 2.1 |
| HDC18670 ('+' in Hild et al)         | DRSC18963 | 3.2 | 0.9  | 2.1 |
| CG5446                               | DRSC02862 | 3.0 | 1.0  | 2.0 |
| hook-like                            | DRSC02062 | 2.8 | 1.2  | 2.0 |
| bubblegum                            | DRSC03495 | 3.2 | 0.7  | 2.0 |
| Tbp                                  | DRSC04662 | 2.6 | 1.4  | 2.0 |
| CG17622                              | DRSC15247 | 3.9 | 0.1  | 2.0 |
| HDC01575 ('+' in Hild et al)         | DRSC01059 | 2.9 | 1.1  | 2.0 |
| par-1                                | DRSC05792 | 2.7 | 1.3  | 2.0 |
| HDC09511 ('+' in Stolc / Hild et al) | DRSC09067 | 4.4 | -0.4 | 2.0 |
| CG9817                               | DRSC18446 | 3.7 | 0.3  | 2.0 |

|                                      |           |     |      |     |
|--------------------------------------|-----------|-----|------|-----|
| CG6854                               | DRSC10729 | 2.7 | 1.2  | 2.0 |
| cryptocephal                         | DRSC03513 | 2.9 | 1.0  | 2.0 |
| CG33558                              | DRSC05013 | 2.5 | 1.4  | 2.0 |
| sticks and stones                    | DRSC06423 | 3.3 | 0.6  | 2.0 |
| HDC11218 ('+' in Hild et al)         | DRSC11443 | 2.6 | 1.3  | 2.0 |
| HDC12421 ('+' in Hild et al)         | DRSC12666 | 3.8 | 0.1  | 2.0 |
| Nnp-1                                | DRSC02165 | 3.7 | 0.1  | 1.9 |
| HDC09529 ('+' in Hild et al)         | DRSC09082 | 2.9 | 0.9  | 1.9 |
| HDC14879 ('+' in Hild et al)         | DRSC13509 | 3.7 | 0.1  | 1.9 |
| CG30497                              | DRSC06425 | 2.7 | 1.0  | 1.9 |
| Gbp                                  | DRSC07434 | 2.5 | 1.2  | 1.9 |
| CG32245                              | DRSC08327 | 3.8 | -0.1 | 1.9 |
| PP2A-B'                              | DRSC16337 | 3.0 | 0.7  | 1.9 |
| HDC07450                             | DRSC05865 | 2.5 | 1.2  | 1.9 |
| CG33980                              | DRSC18089 | 2.9 | 0.8  | 1.9 |
| HDC18410 ('+' in Stolc / Hild et al) | DRSC18886 | 2.9 | 0.8  | 1.9 |
| CG30349                              | DRSC06421 | 3.5 | 0.1  | 1.8 |
| CG5151                               | DRSC10487 | 3.4 | 0.2  | 1.8 |
| E5                                   | DRSC16585 | 2.7 | 0.9  | 1.8 |
| CG34436                              | DRSC15165 | 4.1 | -0.5 | 1.8 |
| Rtc1                                 | DRSC20285 | 3.0 | 0.5  | 1.8 |
| HDC14311 ('+' in Hild et al)         | DRSC14786 | 3.5 | 0.0  | 1.8 |
| CG6962                               | DRSC16153 | 2.7 | 0.7  | 1.7 |
| CG4585                               | DRSC04475 | 3.1 | 0.3  | 1.7 |
| CG11583                              | DRSC08202 | 2.8 | 0.6  | 1.7 |
| fizzy                                | DRSC03534 | 2.7 | 0.7  | 1.7 |
| CG6764                               | DRSC16111 | 2.9 | 0.5  | 1.7 |
| Ten-a                                | DRSC19496 | 2.7 | 0.7  | 1.7 |
| Vps4                                 | DRSC19338 | 2.5 | 0.8  | 1.7 |
| CG9836                               | DRSC16572 | 2.6 | 0.7  | 1.7 |
| CG7031                               | DRSC16178 | 3.1 | 0.2  | 1.7 |
| CG12071                              | DRSC14471 | 2.8 | 0.5  | 1.7 |
| Pdp1                                 | DRSC08896 | 3.7 | -0.4 | 1.7 |
| CG5525                               | DRSC02865 | 2.6 | 0.6  | 1.6 |
| CG18131                              | DRSC00517 | 2.5 | 0.7  | 1.6 |
| nop5                                 | DRSC03582 | 2.6 | 0.6  | 1.6 |
| CG14107                              | DRSC10110 | 3.2 | -0.1 | 1.6 |
| CG32432                              | DRSC11703 | 3.1 | 0.1  | 1.6 |
| fd3F                                 | DRSC17843 | 3.5 | -0.3 | 1.6 |
| HDC14836 ('+' in Hild et al)         | DRSC13493 | 3.1 | 0.1  | 1.6 |
| CG9300                               | DRSC11064 | 2.9 | 0.2  | 1.6 |
| CG30349                              | DRSC06839 | 2.9 | 0.2  | 1.6 |
| Mystery 45A                          | DRSC07067 | 2.6 | 0.5  | 1.6 |

|                                      |           |     |      |     |
|--------------------------------------|-----------|-----|------|-----|
| Su(var)205                           | DRSC03446 | 2.6 | 0.4  | 1.5 |
| HDC08645 ('+' in Stolc / Hild et al) | DRSC08772 | 2.9 | 0.1  | 1.5 |
| HDC14699 ('+' in Stolc / Hild et al) | DRSC13445 | 3.4 | -0.4 | 1.5 |
| CG42337                              | DRSC11687 | 2.6 | 0.2  | 1.4 |
| HDC14817 ('+' in Hild et al)         | DRSC13481 | 2.8 | 0.0  | 1.4 |
| pasilla                              | DRSC16388 | 2.6 | 0.1  | 1.4 |
| HDC12808                             | DRSC12769 | 2.6 | 0.0  | 1.3 |
| HDC15101 ('+' in Stolc / Hild et al) | DRSC13589 | 2.6 | 0.0  | 1.3 |
| CG9948                               | DRSC09690 | 2.7 | -0.2 | 1.3 |
| CG12880                              | DRSC14568 | 2.6 | -0.2 | 1.2 |
| HDC08562                             | DRSC08743 | 2.7 | -0.3 | 1.2 |
| HDC11852 ('+' in Hild et al)         | DRSC12050 | 2.6 | -0.2 | 1.2 |
| HDC14962 ('+' in Hild et al)         | DRSC13553 | 2.7 | -0.4 | 1.2 |
| HDC02648 ('+' in Stolc / Hild et al) | DRSC01457 | 2.6 | -0.4 | 1.1 |
| HDC14638                             | DRSC13421 | 2.5 | -0.5 | 1.0 |
