# Supplementary material for: Drosophila Genome-Wide RNAi Screen Identifies Multiple Regulators of HIF–Dependent Transcription in Hypoxia
Source: PubMed Central journal article supplement (PMC2891703; doi:10.1371/journal.pgen.1000994), 2010-06-24
Supplement: pgen.1000994.s006.pdf [file pgen.1000994.s006.pdf]

**Table S3. Filtered results of the primary screen.**

| Primary screen (filtered) |           |         |         |            |
|---------------------------|-----------|---------|---------|------------|
| Gene                      | Amplicon  | -<br>Z1 | -<br>Z2 | Average -Z |
| no hitter                 | DRSC01976 | 9.3     |         | 9.3        |
| brahma                    | DRSC11330 | 7.8     | 9.1     | 8.5        |
| CG10660                   | DRSC09769 | 7.3     | 8.6     | 8.0        |
| cyclophilin-33            | DRSC07600 | 6.3     | 9.3     | 7.8        |
| CG4174                    | DRSC10406 | 7.7     |         | 7.7        |
| CG4587                    | DRSC01956 | 7.4     |         | 7.4        |
| CG11985                   | DRSC14460 | 5.8     | 8.0     | 6.9        |
| CG9119                    | DRSC08620 | 6.5     | 7.2     | 6.9        |
| CG15278                   | DRSC02481 | 6.5     |         | 6.5        |
| CG32000                   | DRSC17103 | 5.7     | 7.2     | 6.5        |
| sima                      | DRSC17055 | 7.0     | 5.8     | 6.4        |
| CG9134                    | DRSC07954 | 6.3     |         | 6.3        |
| Trip1                     | DRSC03464 | 6.1     | 6.5     | 6.3        |
| CG3605                    | DRSC00619 | 5.8     | 6.6     | 6.2        |
| CG18591                   | DRSC02680 | 5.6     | 6.8     | 6.2        |
| pixie                     | DRSC10533 | 5.7     | 6.4     | 6.1        |
| CG8636                    | DRSC18427 | 5.5     | 6.4     | 6.0        |
| Hsc70-4                   | DRSC16711 | 5.9     | 5.9     | 5.9        |
| Ef2b                      | DRSC03737 | 5.2     | 6.5     | 5.9        |
| CG15494                   | DRSC02502 | 5.7     |         | 5.7        |
| SmB                       | DRSC03437 | 5.9     | 5.3     | 5.6        |
| CG9769                    | DRSC12328 | 5.4     | 5.1     | 5.3        |
| moira                     | DRSC15378 | 5.2     | 5.3     | 5.3        |
| p130CAS                   | DRSC08257 | 5.5     | 4.9     | 5.2        |
| NSL1                      | DRSC15625 | 4.8     | 5.6     | 5.2        |
| Helicase at 25E           | DRSC03342 | 5.1     | 5.1     | 5.1        |
| CG15097                   | DRSC06526 | 5.1     | 5.0     | 5.1        |
| ran                       | DRSC20364 | 4.2     | 5.8     | 5.0        |
| DebB                      | DRSC07397 | 5.0     | 4.8     | 4.9        |
| Rrp6                      | DRSC16223 | 4.2     | 5.6     | 4.9        |
| CG5931                    | DRSC10559 | 4.1     | 5.6     | 4.9        |
| SmD3                      | DRSC07553 | 3.9     | 5.8     | 4.9        |
| squid                     | DRSC17066 | 4.8     |         | 4.8        |
| raptor                    | DRSC18359 | 4.7     |         | 4.7        |

|                |           |     |     |     |
|----------------|-----------|-----|-----|-----|
| CG42342        | DRSC14378 | 4.2 | 5.2 | 4.7 |
| prp8           | DRSC07293 | 5.3 | 4.1 | 4.7 |
| CG7065         | DRSC18420 | 3.6 | 5.7 | 4.7 |
| Tango7         | DRSC07142 | 5.2 | 3.8 | 4.5 |
| CG5482         | DRSC06936 | 6.1 | 2.8 | 4.5 |
| CG8929         | DRSC07298 | 3.8 | 5.1 | 4.5 |
| CG4849         | DRSC15662 | 5.0 | 3.8 | 4.4 |
| CG17304        | DRSC15222 | 4.7 | 4.1 | 4.4 |
| CG15450        | DRSC20522 | 4.6 | 4.2 | 4.4 |
| Spt6           | DRSC18836 | 4.0 | 4.8 | 4.4 |
| AGO1           | DRSC05912 | 6.1 | 2.6 | 4.4 |
| chinmo         | DRSC00509 | 3.6 | 5.1 | 4.4 |
| SF2            | DRSC16845 | 3.2 | 5.4 | 4.3 |
| CSN6           | DRSC16593 | 4.3 |     | 4.3 |
| Jon99Ciii      | DRSC16859 | 4.3 |     | 4.3 |
| AdoR           | DRSC16556 | 4.3 |     | 4.3 |
| crooked-neck   | DRSC18755 | 3.9 | 4.7 | 4.3 |
| Patj           | DRSC08712 | 4.0 | 4.5 | 4.3 |
| Suv4-20        | DRSC18482 | 3.9 | 4.6 | 4.3 |
| snRNP69D       | DRSC09800 | 5.7 | 2.7 | 4.2 |
| TER94          | DRSC07560 | 4.5 | 3.9 | 4.2 |
| pontin         | DRSC17029 | 4.5 | 3.9 | 4.2 |
| ascutex        | DRSC05924 | 2.7 | 5.7 | 4.2 |
| reptin         | DRSC11388 | 5.1 | 3.2 | 4.2 |
| small bristles | DRSC20368 | 4.2 | 4.1 | 4.2 |
| CG7757         | DRSC10912 | 5.1 | 3.2 | 4.2 |
| tango          | DRSC17077 | 3.3 | 4.8 | 4.1 |
| Bap60          | DRSC19337 | 3.8 | 4.4 | 4.1 |
| Slu7           | DRSC14729 | 3.7 | 4.5 | 4.1 |
| Tango4         | DRSC19786 | 3.9 | 4.3 | 4.1 |
| CG13298        | DRSC09972 | 3.3 | 4.9 | 4.1 |
| CG7918         | DRSC16345 | 5.9 | 2.2 | 4.1 |
| Trn-SR         | DRSC00546 | 3.7 | 4.4 | 4.1 |
| Su(var)3-9     | DRSC13081 | 4.0 | 4.1 | 4.1 |
| ph-d           | DRSC18819 | 4.0 |     | 4.0 |
| CG14641        | DRSC12227 | 3.1 | 4.9 | 4.0 |
| CG14180        | DRSC10179 | 4.0 | 3.9 | 4.0 |
| CG6197         | DRSC06967 | 4.1 | 3.8 | 4.0 |
| Pvf2           | DRSC00968 | 2.6 | 5.2 | 3.9 |
| Calx           | DRSC13457 | 3.9 |     | 3.9 |
| Neosin         | DRSC11235 | 3.5 | 4.3 | 3.9 |
| Ef1alpha48D    | DRSC07421 | 3.5 | 4.3 | 3.9 |
| Rheb           | DRSC12148 | 3.0 | 4.7 | 3.9 |
| CG14995        | DRSC08452 | 4.6 | 3.1 | 3.9 |
| CG12499        | DRSC14521 | 3.8 |     | 3.8 |
| Chrac-16       | DRSC20343 | 3.8 |     | 3.8 |
| U2af50         | DRSC20297 | 3.5 | 4.0 | 3.8 |
| bric a brac 1  | DRSC08379 | 3.0 | 4.4 | 3.7 |
| minibrain      | DRSC20058 | 2.7 | 4.7 | 3.7 |
| Ef1gamma       | DRSC16659 | 2.8 | 4.5 | 3.7 |
| I(3)03670      | DRSC16981 | 3.6 |     | 3.6 |

|            |           |     |     |     |
|------------|-----------|-----|-----|-----|
| stumps     | DRSC15332 | 5.3 | 1.9 | 3.6 |
| Rtf1       | DRSC04085 | 3.8 | 3.4 | 3.6 |
| Tcp1-like  | DRSC16877 | 4.5 | 2.6 | 3.6 |
| CG32335    | DRSC07948 | 4.5 | 2.6 | 3.6 |
| rab3-GEF   | DRSC19956 | 3.5 |     | 3.5 |
| hook       | DRSC18674 | 3.5 |     | 3.5 |
| l(1)10Bb   | DRSC20346 | 3.8 | 3.1 | 3.5 |
| CG9164     | DRSC19087 | 3.2 | 3.7 | 3.5 |
| CG34422    | DRSC20029 | 3.2 | 3.7 | 3.5 |
| Camta      | DRSC06441 | 4.2 | 2.6 | 3.4 |
| CG10927    | DRSC06014 | 3.2 | 3.6 | 3.4 |
| fruitless  | DRSC16951 | 3.4 |     | 3.4 |
| CG31179    | DRSC13494 | 3.4 |     | 3.4 |
| CG12470    | DRSC18620 | 3.4 |     | 3.4 |
| CG12484    | DRSC05883 | 3.0 | 3.8 | 3.4 |
| CG9253     | DRSC03171 | 4.2 | 2.5 | 3.4 |
| CG17329    | DRSC01926 | 3.3 |     | 3.3 |
| Furin 1    | DRSC13707 | 3.2 | 3.4 | 3.3 |
| Tektin-C   | DRSC09741 | 3.0 | 3.6 | 3.3 |
| CG4570     | DRSC15602 | 4.1 | 2.4 | 3.3 |
| Snr1       | DRSC12369 | 3.2 | 3.3 | 3.3 |
| Sox100B    | DRSC15090 | 3.2 |     | 3.2 |
| Rrp45      | DRSC20198 | 3.2 |     | 3.2 |
| CG11138    | DRSC19385 | 3.2 |     | 3.2 |
| bhringi    | DRSC11000 | 3.1 | 3.3 | 3.2 |
| CG3436     | DRSC00605 | 4.2 | 2.1 | 3.2 |
| CG3983     | DRSC15529 | 5.0 | 1.3 | 3.2 |
| thisbe     | DRSC06153 | 4.6 | 1.7 | 3.2 |
| CG31461    | DRSC13113 | 2.5 | 3.8 | 3.2 |
| CG14543    | DRSC14887 | 3.1 |     | 3.1 |
| RnrL       | DRSC03413 | 2.7 | 3.5 | 3.1 |
| CG6937     | DRSC16140 | 3.4 | 2.8 | 3.1 |
| CG31847    | DRSC02535 | 2.9 | 3.3 | 3.1 |
| D19A       | DRSC11133 | 3.5 | 2.6 | 3.1 |
| U2af38     | DRSC00796 | 3.2 | 2.9 | 3.1 |
| cropped    | DRSC03515 | 2.7 | 3.4 | 3.1 |
| CG2446     | DRSC19847 | 3.0 |     | 3.0 |
| CG2685     | DRSC18463 | 3.0 |     | 3.0 |
| CG9777     | DRSC20208 | 3.0 |     | 3.0 |
| Rbm13      | DRSC17749 | 3.0 |     | 3.0 |
| Cbp20      | DRSC16601 | 3.0 |     | 3.0 |
| snRNP2     | DRSC12536 | 2.8 | 3.2 | 3.0 |
| CG15630    | DRSC00465 | 3.7 | 2.2 | 3.0 |
| l(2)35Df   | DRSC03560 | 3.6 | 2.3 | 3.0 |
| roadkill   | DRSC14526 | 3.4 | 2.5 | 3.0 |
| Clipper    | DRSC00746 | 2.9 | 3.0 | 3.0 |
| CG10754    | DRSC09801 | 2.7 | 3.2 | 3.0 |
| Sec61alpha | DRSC03256 | 3.7 | 2.1 | 2.9 |
| Spt5       | DRSC07556 | 3.6 | 2.2 | 2.9 |
| TweedleN   | DRSC15813 | 2.9 |     | 2.9 |
| CG4218     | DRSC01939 | 2.9 |     | 2.9 |

|                       |           |     |     |     |
|-----------------------|-----------|-----|-----|-----|
| Ef1alpha100E          | DRSC16658 | 2.9 |     | 2.9 |
| Fasciclin 2           | DRSC17308 | 2.9 |     | 2.9 |
| CG12278               | DRSC14494 | 2.9 |     | 2.9 |
| Cdc42                 | DRSC20228 | 3.3 | 2.4 | 2.9 |
| CG6509                | DRSC02964 | 2.8 | 2.9 | 2.9 |
| Nup98                 | DRSC14209 | 3.6 | 2.0 | 2.8 |
| peanuts               | DRSC07120 | 3.2 | 2.4 | 2.8 |
| blue cheese           | DRSC02333 | 3.2 | 2.4 | 2.8 |
| Dim1                  | DRSC00563 | 3.0 | 2.6 | 2.8 |
| beat-IIb              | DRSC13219 | 2.8 |     | 2.8 |
| MED28                 | DRSC15721 | 2.8 |     | 2.8 |
| Cpr66D                | DRSC10646 | 3.9 | 1.6 | 2.8 |
| CG9426                | DRSC03219 | 3.6 | 1.9 | 2.8 |
| MBD-R2                | DRSC14180 | 3.1 | 2.4 | 2.8 |
| Beadex                | DRSC19350 | 2.6 | 2.9 | 2.8 |
| CSN3                  | DRSC11859 | 3.4 | 2.0 | 2.7 |
| Tim9b                 | DRSC19566 | 3.1 | 2.3 | 2.7 |
| MED22                 | DRSC18175 | 2.7 |     | 2.7 |
| Tim17b2               | DRSC03457 | 2.7 |     | 2.7 |
| Nepriylsin 1          | DRSC18389 | 2.7 |     | 2.7 |
| CG31229               | DRSC13309 | 2.9 | 2.2 | 2.6 |
| dalao                 | DRSC18419 | 2.9 | 2.2 | 2.6 |
| CG18375               | DRSC04305 | 2.7 | 2.5 | 2.6 |
| CG4959                | DRSC01938 | 2.6 |     | 2.6 |
| CG5732                | DRSC15863 | 2.6 |     | 2.6 |
| CG30127               | DRSC05786 | 2.6 |     | 2.6 |
| vrille                | DRSC03633 | 4.6 | 0.6 | 2.6 |
| Symplekin             | DRSC12301 | 2.8 | 2.4 | 2.6 |
| CG5739                | DRSC02885 | 3.1 | 2.0 | 2.6 |
| CG4830                | DRSC15657 | 3.1 | 2.0 | 2.6 |
| spn-F                 | DRSC14475 | 2.8 | 2.3 | 2.6 |
| Rbp2                  | DRSC20276 | 2.9 | 2.2 | 2.6 |
| cut                   | DRSC18757 | 2.8 | 2.1 | 2.5 |
| I(2)k09022            | DRSC02108 | 3.8 | 1.2 | 2.5 |
| Su(Tpl)               | DRSC10954 | 2.8 | 2.2 | 2.5 |
| CG8885                | DRSC03117 | 2.8 | 2.2 | 2.5 |
| CG13278               | DRSC02252 | 2.5 |     | 2.5 |
| CG7532                | DRSC01910 | 2.5 |     | 2.5 |
| Hsp83                 | DRSC08664 | 2.7 | 2.2 | 2.5 |
| CG7597                | DRSC11836 | 2.5 | 2.4 | 2.5 |
| CG2865                | DRSC18528 | 2.8 | 2.1 | 2.5 |
| SmG                   | DRSC20207 | 2.9 | 2.0 | 2.5 |
| Stam                  | DRSC03444 | 2.6 | 2.2 | 2.4 |
| pUf68                 | DRSC08731 | 3.4 | 1.4 | 2.4 |
| Tor                   | DRSC02811 | 2.8 | 2.0 | 2.4 |
| CG4615                | DRSC18376 | 3.0 | 1.7 | 2.4 |
| Hsp70Ab               | DRSC15380 | 2.9 | 1.8 | 2.4 |
| hyrax                 | DRSC14462 | 2.7 | 2.0 | 2.4 |
| Fatty acid synthetase | DRSC00268 | 2.6 | 2.0 | 2.3 |
| Neurocalcin           | DRSC07022 | 2.5 | 2.1 | 2.3 |
| PDK1                  | DRSC08682 | 3.0 | 1.5 | 2.3 |

|              |           |     |      |     |
|--------------|-----------|-----|------|-----|
| CG31705      | DRSC01991 | 2.9 | 1.6  | 2.3 |
| bunched      | DRSC03500 | 2.7 | 1.8  | 2.3 |
| Klp61F       | DRSC08671 | 2.7 | 1.8  | 2.3 |
| pgant6       | DRSC08552 | 2.7 | 1.8  | 2.3 |
| CSN7         | DRSC06807 | 2.5 | 2.0  | 2.3 |
| dre4         | DRSC08714 | 3.7 | 0.7  | 2.2 |
| CG13779      | DRSC02282 | 3.1 | 1.3  | 2.2 |
| CG34113      | DRSC12263 | 3.1 | 1.3  | 2.2 |
| Hexokinase C | DRSC07079 | 2.8 | 1.6  | 2.2 |
| CG6015       | DRSC15948 | 2.7 | 1.7  | 2.2 |
| Hsp70Bb      | DRSC21248 | 2.7 | 1.7  | 2.2 |
| Cct5         | DRSC07357 | 3.5 | 0.8  | 2.2 |
| muscleblind  | DRSC07651 | 2.9 | 1.4  | 2.2 |
| Mlf          | DRSC07472 | 3.4 | 0.7  | 2.1 |
| Tie          | DRSC08702 | 2.8 | 1.3  | 2.1 |
| CG5446       | DRSC02862 | 3.0 | 1.0  | 2.0 |
| hook-like    | DRSC02062 | 2.8 | 1.2  | 2.0 |
| bubblegum    | DRSC03495 | 3.2 | 0.7  | 2.0 |
| CG6854       | DRSC10729 | 2.7 | 1.2  | 2.0 |
| cryptocephal | DRSC03513 | 2.9 | 1.0  | 2.0 |
| Nnp-1        | DRSC02165 | 3.7 | 0.1  | 1.9 |
| Gbp          | DRSC07434 | 2.5 | 1.2  | 1.9 |
| CG32245      | DRSC08327 | 3.8 | -0.1 | 1.9 |
| CG30349      | DRSC06421 | 3.5 | 0.1  | 1.8 |
| Rtc1         | DRSC20285 | 3.0 | 0.5  | 1.8 |
| CG6962       | DRSC16153 | 2.7 | 0.7  | 1.7 |
| CG4585       | DRSC04475 | 3.1 | 0.3  | 1.7 |
| CG11583      | DRSC08202 | 2.8 | 0.6  | 1.7 |
| Vps4         | DRSC19338 | 2.5 | 0.8  | 1.7 |
| CG5525       | DRSC02865 | 2.6 | 0.6  | 1.6 |
| CG18131      | DRSC00517 | 2.5 | 0.7  | 1.6 |
| CG14107      | DRSC10110 | 3.2 | -0.1 | 1.6 |
| CG9300       | DRSC11064 | 2.9 | 0.2  | 1.6 |
| Mystery 45A  | DRSC07067 | 2.6 | 0.5  | 1.6 |
| Su(var)205   | DRSC03446 | 2.6 | 0.4  | 1.5 |
| pasilla      | DRSC16388 | 2.6 | 0.1  | 1.4 |
| CG9948       | DRSC09690 | 2.7 | -0.2 | 1.3 |
| CG12880      | DRSC14568 | 2.6 | -0.2 | 1.2 |
