# Supplementary material for: Drosophila Genome-Wide RNAi Screen Identifies Multiple Regulators of HIF–Dependent Transcription in Hypoxia
Source: PubMed Central journal article supplement (PMC2891703; doi:10.1371/journal.pgen.1000994), 2010-06-24
Supplement: pgen.1000994.s007.pdf [file pgen.1000994.s007.pdf]

**Table S4. Secondary screen.**

| <b>Secondary screen</b>                                 |                   |                      |                   |                      |
|---------------------------------------------------------|-------------------|----------------------|-------------------|----------------------|
| <b>Gene</b>                                             | <b>Amplicon 1</b> | <b>Inhibition(%)</b> | <b>Amplicon 2</b> | <b>Inhibition(%)</b> |
| <b>GROUP A: Inhibition of the DFO response &gt; 75%</b> |                   |                      |                   |                      |
| sima                                                    | DRSC33101         | 96,8 +/- 1,0         | DRSC33100         | 96,4 +/- 0,5         |
| tango                                                   | DRSC37262         | 95,9 +/- 0,6         |                   |                      |
| brahma                                                  | DRSC30902         | 89,0 +/- 4,1         | DRSC30901         | 85,0 +/- 2,4         |
| Trip1                                                   | DRSC32225         | 87,4 +/- 9,5         | DRSC32224         | 87,3 +/- 0,7         |
| CG14641                                                 | DRSC31837         | 85,7 +/- 0,2         | DRSC31836         | 80,2 +/- 1,0         |
| Ef2b                                                    | DRSC32107         | 85,6 +/- 2,7         | DRSC32106         | 77,4 +/- 7,4         |
| CG7065                                                  | DRSC35474         | 85,2 +/- 2,0         |                   |                      |
| tango7                                                  | DRSC31146         | 85,1 +/- 3,9         | DRSC31145         | 86,0 +/- 0,0         |
| Spt6                                                    | DRSC31075         | 83,4 +/- 0,0         | DRSC31074         | 69,1 +/- 6,8         |
| AGO1                                                    | DRSC30762         | 83,2 +/- 3,0         | DRSC30761         | 79,7 +/- 2,8         |
| pixie                                                   | DRSC32078         | 81,8 +/- 1,4         | DRSC32077         | 80,6 +/- 7,4         |
| moira                                                   | DRSC32754         | 78,6 +/- 3,9         | DRSC32753         | 83,1 +/- 1,2         |
| Snr1                                                    | DRSC32770         | 78,4 +/- 6,7         | DRSC32769         | 56,4 +/- 5,1         |
| Symplekin                                               | DRSC32363         | 78,2 +/- 10,7        | DRSC32362         | 81,9 +/- 5,8         |
| CG4849                                                  | DRSC31791         | 76,5 +/- 17,3        | DRSC31790         | 75,3 +/- 8,2         |
| TER94                                                   | DRSC32221         | 75,9 +/- 3,2         | DRSC32220         | 76,5 +/- 11,9        |
| reptin                                                  | DRSC32532         | 75,5 +/- 15,2        | DRSC32531         | 77,7 +/- 5,3         |
| MBD-R2                                                  | DRSC32495         | 75,2 +/- 0,8         | DRSC32494         | 73,4 +/- 7,9         |
| NSL1                                                    | DRSC31789         | 74,5 +/- 2,8         | DRSC31788         | 84,4 +/- 4,7         |
| prp8                                                    | DRSC31801         | 74,3 +/- 2,8         | DRSC31800         | 85,3 +/- 6,9         |
| peanuts                                                 | DRSC31799         | 68,3 +/- 8,4         | DRSC31798         | 80,9 +/- 6,9         |
| CG9769                                                  | DRSC32096         | 66,7 +/- 9,3         | DRSC32095         | 81,2 +/- 16,3        |
| CG2446                                                  | DRSC32889         | 62,2 +/- 1,5         | DRSC32888         | 81,0 +/- 1,3         |
| <b>GROUP B: Inhibition of the DFO response 50 - 75%</b> |                   |                      |                   |                      |
| Helicase at 25E                                         | DRSC30680         | 72,7 +/- 3,0         | DRSC30679         | 61,4 +/- 21,0        |
| tango4                                                  | DRSC31783         | 70,8 +/- 3,4         | DRSC31782         | 43,4 +/- 2,3         |
| pontin                                                  | DRSC31863         | 70,7 +/- 2,2         | DRSC31862         | 72,4 +/- 1,6         |

|                                                |           |                |           |               |
|------------------------------------------------|-----------|----------------|-----------|---------------|
| CG5931                                         | DRSC32420 | 70,4 +/- 18,2  | DRSC32419 | 58,8 +/- 1,8  |
| CG32000                                        | DRSC32056 | 70,2 +/- 12,7  | DRSC32055 | 60,7 +/- 1,6  |
| U2af38                                         | DRSC28068 | 70,1 +/- 15,6  |           |               |
| CSN3                                           | DRSC32998 | 69,4 +/- 8,6   | DRSC32997 | 71,9 +/- 2,6  |
| CSN6                                           | DRSC35658 | 68,8 +/- 19,6  |           |               |
| cropped                                        | DRSC30708 | 66,0 +/- 9,0   |           |               |
| CG9253                                         | DRSC37278 | 65,8 +/- 7,1   |           |               |
| CG18591                                        | DRSC31785 | 65,7 +/- 23,6  | DRSC31784 | 22 +/- 28,7   |
| CG14543                                        | DRSC26647 | 64,1 +/- 4,5   |           |               |
| U2af50                                         | DRSC37266 | 64,0 +/- 2,5   |           |               |
| CG7757                                         | DRSC30869 | 63,1 +/- 18,6  | DRSC30868 | 63,4 +/- 1,4  |
| Gbp                                            | DRSC34548 | 62,7 +/- 3,5   | DRSC34547 | 51,0 +/- 2,5  |
| dalao                                          | DRSC35681 | 60,3 +/- 41,0  |           |               |
| crooked-neck                                   | DRSC31853 | 60,0 +/- 41,1  | DRSC31852 | 64,1 +/- 10,2 |
| Rrp6                                           | DRSC32601 | 59,5 +/- 41,2  | DRSC32600 | 40,0 +/- 22,0 |
| Tor                                            | DRSC30664 | 59,4 +/- 41,3  | DRSC30663 | 39,5 +/- 12,5 |
| CG10754                                        | DRSC33610 | 59,3 +/- 41,4  |           |               |
| CG11583                                        | DRSC32312 | 58,5 +/- 41,5  | DRSC32311 | 52,0 +/- 7,9  |
| CG6509                                         | DRSC37258 | 58,3 +/- 41,6  |           |               |
| Sec61alpha                                     | DRSC31246 | 58,3 +/- 41,7  | DRSC31245 | 12,4 +/- 3,8  |
| lethal(1)10Bb                                  | DRSC31944 | 58,1 +/- 41,8  | DRSC31943 | 49,2 +/- 52,6 |
| Su(var)3-9                                     | DRSC27837 | 58,0 +/- 41,9  |           |               |
| CG6197                                         | DRSC31706 | 57,5 +/- 41,10 | DRSC31705 | 47,2 +/- 44,0 |
| SmD3                                           | DRSC32012 | 57,4 +/- 41,11 |           |               |
| Dim1                                           | DRSC33266 | 56,6 +/- 41,12 | DRSC33265 | 55,5 +/- 7,9  |
| TweedleN                                       | DRSC25037 | 56,4 +/- 41,13 |           |               |
| squid                                          | DRSC32626 | 55,7 +/- 41,14 | DRSC32625 | 22,3 +/- 26,9 |
| Bap60                                          | DRSC32657 | 55,5 +/- 41,15 | DRSC32656 | 46,4 +/- 11,1 |
| raptor                                         | DRSC31050 | 55,2 +/- 41,16 | DRSC31049 | 63,5 +/- 0,9  |
| clipper                                        | DRSC37267 | 54,1 +/- 41,17 |           |               |
| CG13779                                        | DRSC30654 | 53,9 +/- 41,18 | DRSC30653 | 70,2 +/- 9,2  |
| lethal(2)35Df                                  | DRSC32489 | 52,9 +/- 41,19 | DRSC32488 | 38,9 +/- 22,5 |
| Mlf                                            | DRSC35853 | 52,6 +/- 41,20 |           |               |
| Rbp2                                           | DRSC37291 | 50,5 +/- 41,21 |           |               |
| cryptocephal                                   | DRSC37279 | 49,9 +/- 41,22 |           |               |
| Spt5                                           | DRSC31820 | 48,1 +/- 41,23 | DRSC31819 | 52,2 +/- 1,3  |
| pUf68                                          | DRSC31973 | 42,3 +/- 41,24 | DRSC31972 | 62,2 +/- 16,8 |
| Nup98                                          | DRSC31804 | 40,9 +/- 41,25 | DRSC31803 | 59,6 +/- 11,1 |
| CG3605                                         | DRSC31847 | 40,7 +/- 41,26 | DRSC31846 | 57,8 +/- 15,6 |
| PDK1                                           | DRSC30826 | 36,1 +/- 41,27 | DRSC30825 | 51,0 +/- 29,6 |
| <b>Inhibition of the DFO response &lt; 50%</b> |           |                |           |               |
| hyrax                                          | DRSC30952 | 49,3 +/- 0,4   | DRSC30951 | 33,0 +/- 24,6 |
| Hsp83                                          | DRSC33050 | 48,2 +/- 9,9   | DRSC33049 | 45,4 +/- 12,5 |
| Pvf2                                           | DRSC35971 | 47,7 +/- 47,4  |           |               |
| SF2                                            | DRSC32605 | 47,4 +/- 27,0  | DRSC32604 | 51,8 +/- 4,1  |
| CG5525                                         | DRSC35379 | 47,0 +/- 17,0  |           |               |
| bhringi                                        | DRSC32022 | 46,9 +/- 3,3   | DRSC32021 | 20,6 +/- 13,8 |
| Rtf1                                           | DRSC30728 | 46,8 +/- 14,7  | DRSC30727 | 37,5 +/- 8,5  |
| DebB                                           | DRSC31802 | 46,6 +/- 34,2  |           |               |

|                |           |               |           |               |
|----------------|-----------|---------------|-----------|---------------|
| CG11985        | DRSC31771 | 45,5 +/- 1,0  | DRSC31770 | 49,7 +/- 6,0  |
| Slu7           | DRSC31779 | 44,3 +/- 35,0 | DRSC31778 | 23,6 +/- 61,8 |
| p130CAS        | DRSC34850 | 43,1 +/- 9,9  |           |               |
| Su(var)205     | DRSC37257 | 42,3 +/- 10,8 |           |               |
| CG14180        | DRSC32333 | 40,3 +/- 42,3 | DRSC32332 | 20,3 +/- 19,1 |
| bunched        | DRSC32803 | 39,1 +/- 15,4 |           |               |
| SmG            | DRSC35622 | 38,7 +/- 10,4 | DRSC35621 | 37,4 +/- 3,9  |
| CG15278        | DRSC37276 | 38,1 +/- 6,2  |           |               |
| CG4959         | DRSC37273 | 37,9 +/- 10,9 |           |               |
| Rheb           | DRSC30920 | 37,8 +/- 9,8  | DRSC30919 | 46,6 +/- 21,3 |
| CG6962         | DRSC32278 | 36,3 +/- 18,1 | DRSC32277 | 16 +/- 30,2   |
| CG31461        | DRSC35138 | 36,2 +/- 16,3 | DRSC35137 | 19,7 +/- 17,3 |
| CG2685         | DRSC32365 | 36,1 +/- 34,0 | DRSC32364 | 45,4 +/- 52,8 |
| Su(Tpl)        | DRSC36037 | 34,2 +/- 15,5 |           |               |
| Tcp1-like      | DRSC34599 | 33,1 +/- 9,3  | DRSC34598 | 22,5 +/- 6,2  |
| snRNP2         | DRSC31833 | 32,7 +/- 0,7  | DRSC31832 | 25,1 +/- 26,4 |
| CG14995        | DRSC31557 | 32,6 +/- 17,2 |           |               |
| cut            | DRSC25100 | 31,2 +/- 14,6 |           |               |
| CG6015         | DRSC32424 | 31,1 +/- 38,9 | DRSC32423 | 43,3 +/- 20,8 |
| CG9777         | DRSC35623 | 30,5 +/- 0,3  |           |               |
| fruitless      | DRSC31020 | 30,3 +/- 26,5 |           |               |
| CG8929         | DRSC34413 | 30,1 +/- 29,5 | DRSC34412 | 47,6 +/- 5,2  |
| MED22          | DRSC35840 | 29,7 +/- 30,2 |           |               |
| CG3983         | DRSC37285 | 29,2 +/- 3,9  |           |               |
| Rtc1           | DRSC35998 | 28,6 +/- 3,8  |           |               |
| CG9948         | DRSC37281 | 28,6 +/- 9,7  |           |               |
| small bristles | DRSC33352 | 28,3 +/- 21,5 | DRSC33351 | 32,4 +/- 7,2  |
| CG18131        | DRSC31565 | 28 +/- 15,4   | DRSC31564 | 28,1 +/- 10,8 |
| CG30349        | DRSC33264 | 27,6 +/- 21,2 | DRSC33263 | 22 +/- 9,7    |
| CG14107        | DRSC32857 | 27,3 +/- 16,8 |           |               |
| Neosin         | DRSC35885 | 26,9 +/- 25,1 |           |               |
| Sox100B        | DRSC32624 | 25,9 +/- 11,7 |           |               |
| Cdc42          | DRSC31437 | 25,9 +/- 21,0 | DRSC31436 | 29,1 +/- 29,5 |
| Ef1alpha48D    | DRSC32105 | 25,7 +/- 2,1  |           |               |
| CG14210        | DRSC29021 | 25,4 +/- 25,4 |           |               |
| Rbm13          | DRSC33595 | 25,3 +/- 3,9  |           |               |
| CG32245        | DRSC31575 | 25,2 +/- 2,6  | DRSC31574 | 29,8 +/- 24,0 |
| dre4           | DRSC33008 | 24,6 +/- 4,6  | DRSC33007 | 14,8 +/- 2,5  |
| bric a brac 1  | DRSC32796 | 24,6 +/- 19,4 |           |               |
| CG34159        | DRSC31584 | 24,5 +/- 6,9  |           |               |
| CG9300         | DRSC32094 | 24,4 +/- 20,3 | DRSC32093 | 7,2 +/- 25,6  |
| rab3-GEF       | DRSC31094 | 24,2 +/- 3,1  | DRSC31093 | 44,2 +/- 0,0  |
| SmB            | DRSC31869 | 23,9 +/- 11,4 | DRSC31868 | 18,7 +/- 36,2 |
| CG31179        | DRSC35106 | 23,7 +/- 9,1  |           |               |
| Hsp70Bb        | DRSC34562 | 23,6 +/- 25,6 |           |               |
| Hsp70Ab        | DRSC29327 | 23,3 +/- 35,3 |           |               |
| no hitter      | DRSC35889 | 22,5 +/- 16,4 |           |               |
| CG3436         | DRSC32274 | 22,5 +/- 1,5  | DRSC32273 | 13,1 +/- 9,8  |
| tektin-C       | DRSC32219 | 22,3 +/- 22,1 | DRSC32218 | 59,4 +/- 15,6 |
| Cct5           | DRSC32024 | 22,0 +/- 27,6 | DRSC32023 | 25,1 +/- 10,1 |
| CG31705        | DRSC30648 | 21,5 +/- 9,4  |           |               |

|                 |           |               |           |               |
|-----------------|-----------|---------------|-----------|---------------|
| camta           | DRSC26757 | 21,5 +/- 39,1 |           |               |
| Tie             | DRSC30830 | 21,3 +/- 17,4 | DRSC30829 | 42,3 +/- 8,9  |
| lethal(2)k09022 | DRSC32028 | 20,1 +/- 4,2  | DRSC32027 | 18,4 +/- 11,2 |
| CG6937          | DRSC32426 | 19,6 +/- 3,4  | DRSC32425 | 12,2 +/- 23,8 |
| CG42243         | DRSC25912 | 19,5 +/- 10,9 |           |               |
| stam            | DRSC37259 | 19,4 +/- 13,7 |           |               |
| hook            | DRSC31032 | 19,1 +/- 0,0  | DRSC31031 | 11,6 +/- 0,0  |
| CG17329         | DRSC28365 | 18,8 +/- 16,1 |           |               |
| CG34113         | DRSC24955 | 18,6 +/- 7,3  |           |               |
| CG4218          | DRSC27814 | 18,3 +/- 5,6  |           |               |
| CG31847         | DRSC35170 | 18,3 +/- 9,1  |           |               |
| furin 1         | DRSC35749 | 18,2 +/- 29,9 |           |               |
| CG4174          | DRSC37283 | 17,6 +/- 25,3 |           |               |
| CG13298         | DRSC30848 | 17,3 +/- 9,5  |           |               |
| CG4587          | DRSC37274 | 16,7 +/- 3,7  |           |               |
| CG12484         | DRSC28353 | 16,6 +/- 9,3  |           |               |
| CG10660         | DRSC33244 | 16,5 +/- 12,4 |           |               |
| CG13278         | DRSC37275 | 16,0 +/- 6,3  |           |               |
| Ef1alpha100E    | DRSC32104 | 15,6 +/- 25,0 | DRSC32103 | 24,7 +/- 40,7 |
| minibrain       | DRSC24961 | 15,1 +/- 0,1  |           |               |
| CG15097         | DRSC37260 | 14,7 +/- 9,5  |           |               |
| fasciclin 2     | DRSC35731 | 13,4 +/- 20,7 |           |               |
| Rrp45           | DRSC29319 | 12,5 +/- 6,9  |           |               |
| Mystery 45A     | DRSC32156 | 12,4 +/- 22,2 | DRSC32155 | 14,3 +/- 33,8 |
| CG5732          | DRSC31849 | 12,2 +/- 27,9 | DRSC31848 | 12,2 +/- 16,3 |
| Cbp20           | DRSC32000 | 11,9 +/- 15,3 | DRSC31999 | 15,3 +/- 8,2  |
| CG32335         | DRSC25511 | 10,8 +/- 28,2 |           |               |
| beadex          | DRSC33491 | 10,6 +/- 14,2 |           |               |
| CG9164          | DRSC37295 | 10,4 +/- 39,5 |           |               |
| CG9119          | DRSC35587 | 10,3 +/- 26,8 |           |               |
| Tim9b           | DRSC32272 | 10,1 +/- 50,9 |           |               |
| CG8636          | DRSC32088 | 9,9 +/- 16,6  | DRSC32087 | 90,4 +/- 0,7  |
| calx            | DRSC36151 | 9,3 +/- 14,2  |           |               |
| Ef1gamma        | DRSC35716 | 9,0 +/- 5,0   |           |               |
| ph-d            | DRSC32519 | 8,8 +/- 4,8   | DRSC32518 | 6,2 +/- 7,0   |
| CG9134          | DRSC23750 | 8,6 +/- 23,3  |           |               |
| ascutex         | DRSC31953 | 7,3 +/- 27,2  | DRSC31952 | 6,2 +/- 10,4  |
| lethal(3)03670  | DRSC26451 | 7,3 +/- 1,7   |           |               |
| CG34422         | DRSC35485 | 6,9 +/- 0,4   |           |               |
| CG5446          | DRSC36259 | 6,5 +/- 2,9   |           |               |
| Klp61F          | DRSC30824 | 6,2 +/- 60,4  | DRSC30823 | 31,8 +/- 10,6 |
| CG30127         | DRSC37293 | 6,0 +/- 23,2  |           |               |
| CG4570          | DRSC37284 | 5,0 +/- 5,6   |           |               |
| CG15450         | DRSC37292 | 5,0 +/- 11,5  |           |               |
